# Supplementary material for: Ligand-free iron-based electrochemically mediated atom transfer radical polymerization of methyl methacrylate
Source: Royal Society of Chemistry journal article supplement (doi:10.1039/c8py00933c), 2018-01-01
Supplement: c8py00933c1.pdf [file c8py00933c1.pdf]

## Supporting Information for

### Ligand-free iron-based electrochemically mediated atom transfer radical polymerization of methyl methacrylate

Jirong Wang,<sup>a†</sup> Mengying Tian,<sup>b†</sup> Shaoqiao Li,<sup>a</sup> Rui Wang,<sup>a</sup> Feipeng Du,<sup>b\*</sup> Zhigang Xue<sup>a\*</sup>

\*Correspondence to: zgxue@mail.hust.edu.cn; hsdfp@163.com

#### Polymerization Data:

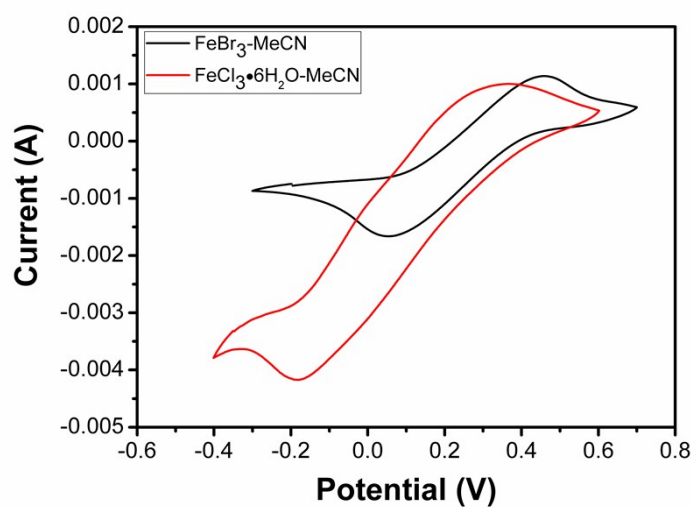

**Figure S1.** CV of 10mM FeCl<sub>3</sub>·6H<sub>2</sub>O (red) and FeBr<sub>3</sub> (black) in MeCN containing 0.1 M Et<sub>4</sub>NBF<sub>4</sub> recorded at a scan rate (v) of 50 mV/s.

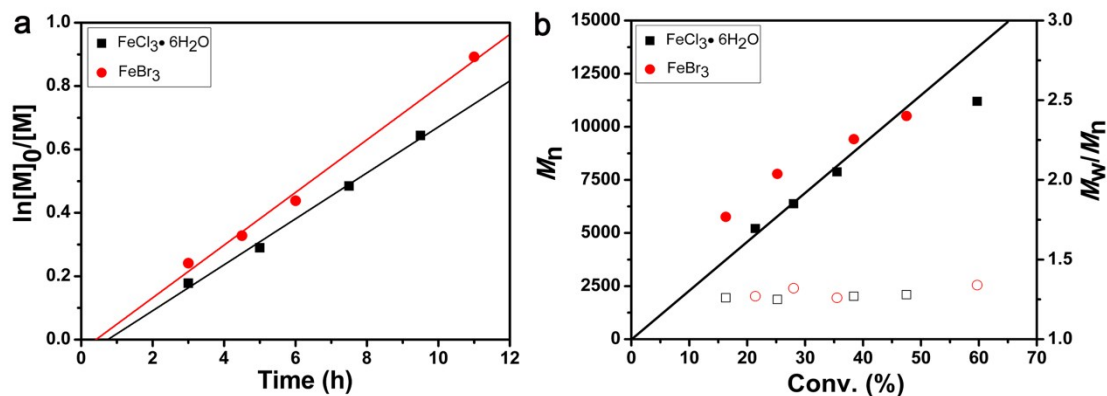

**Figure S2.** Effect of different types of catalyst on seATRP: (a) First-order kinetic plots of  $\ln([M]_0/[M])$  versus time; (b) plots of  $M_n$  (filled symbols) and  $M_w/M_n$  (open symbols) values versus conversion. Reaction conditions:  $[MMA]_0/[EBPA]_0/[catalysts]_0 = 200:1:1$ ,  $[MMA]_0/[MeCN]_0 = 3:1$  (v/v), 0.1 M  $\text{Et}_4\text{NBF}_4$ ,  $T = 95^\circ\text{C}$ ,  $E_{\text{app}} = -0.59\text{V}$ .

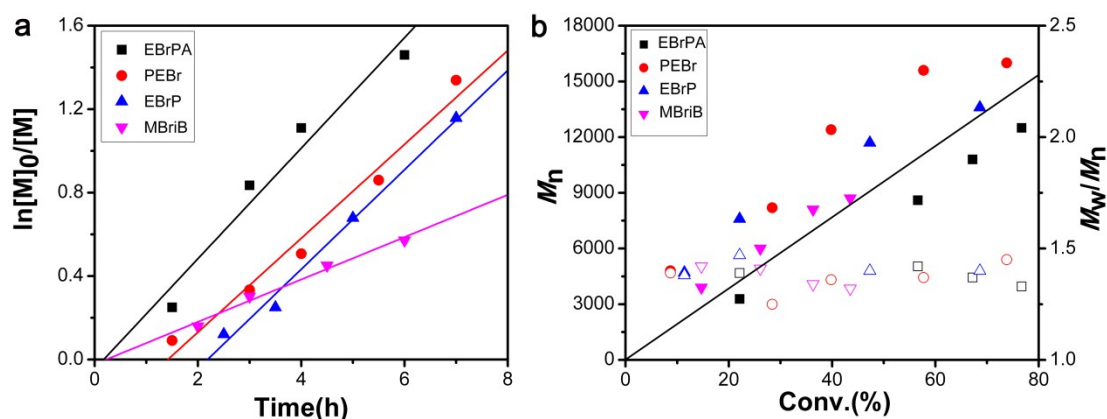

**Figure S3.** Kinetic of iron-catalyzed seATRP using different types of initiators: First-order kinetic plots of  $\ln([M]_0/[M])$  versus time; (B) plots of  $M_n$  (filled symbols) and  $M_w/M_n$  (open symbols) values versus conversion. Reaction conditions:  $[MMA]_0/[initiator]_0/[\text{FeCl}_3 \cdot 6\text{H}_2\text{O}]_0 = 200:1:1$ ,  $[MMA]_0/[\text{NMP}]_0 = 3:1$  (v/v), 0.1 M  $\text{Et}_4\text{NBF}_4$ ,  $T = 95^\circ\text{C}$ .

**Table S1.** Iron-mediated seATRP of MMA exposed in air.

| <b>Entry</b> | <b>Time<br/>(h)</b> | <b>Conv.<br/>(%)</b> | <b><math>M_{n,th}</math><br/>(g/mol)</b> | <b><math>M_{n,GPC}</math><br/>(g/mol)</b> | <b><math>M_w/M_n</math></b> |
|--------------|---------------------|----------------------|------------------------------------------|-------------------------------------------|-----------------------------|
| 1            | 2.5                 | 10.2                 | 2290                                     | 2190                                      | 1.22                        |
| 2            | 4.0                 | 17.9                 | 3830                                     | 4800                                      | 1.48                        |
| 3            | 6.0                 | 45.2                 | 9300                                     | 11600                                     | 1.39                        |
| 4            | 9.0                 | 75.6                 | 15380                                    | 15400                                     | 1.30                        |
